# Supplementary material for: Symmetric dimethylarginine concentrations in dogs with International Renal Interest Society stage 4 chronic kidney disease undergoing intermittent hemodialysis
Source: PubMed Central journal article supplement (PMC6872610; doi:10.1111/jvim.15612), 2019-09-12
Supplement: JVIM-33-2635-s001.pdf [file JVIM-33-2635-s001.pdf]

## Supplementary Tables

Table A1.A– Online appendix: Serum creatinine (mg/dL) Pre- and Post-Values; number (*N*), mean, median and standard deviation (SD) of dogs undergoing intermittent hemodialysis

| <i>Dogs</i>   | <i>Sessions</i> |      |      |      |      |      |      |      |      |      |      |      |      |      |
|---------------|-----------------|------|------|------|------|------|------|------|------|------|------|------|------|------|
|               | 1               |      | 2    |      | 3    |      | 4    |      | 5    |      | 6    |      | 7    |      |
|               | Pre             | Post | Pre  | Post | Pre  | Post | Pre  | Post | Pre  | Post | Pre  | Post | Pre  | Post |
| <i>1H</i>     | 10.1            | 5.4  | 9.7  | 3.0  |      |      |      |      |      |      |      |      |      |      |
| <i>2H</i>     | 9.8             | 5.7  | 7.4  | 2.9  |      |      |      |      |      |      |      |      |      |      |
| <i>3H</i>     | 12.2            | 2.9  | 5.8  | 2.4  | 7.3  | 2.4  |      |      |      |      |      |      |      |      |
| <i>4H</i>     | 6.5             | 5.0  | 5    | 3.7  | 4.2  | 2.8  | 3.6  | 2.7  |      |      |      |      |      |      |
| <i>5H</i>     | 10.4            | 7.0  | 12.2 | 5.8  | 9.9  | 5.7  | 9.5  | 5.2  |      |      |      |      |      |      |
| <i>6H</i>     | 7.3             | 5.0  | 7.2  | 3.1  | 7.2  | 4.6  | 8.3  | 4.1  |      |      |      |      |      |      |
| <i>7H</i>     | 6.1             | 3.7  | 7.8  | 5.8  | 8.6  | 2.7  | 7    | 4.4  | 7.6  | 3.0  |      |      |      |      |
| <i>8H</i>     | 7.7             | 4.1  | 5.8  | 2.4  | 5.3  | 2.8  | 5.8  | 2.7  | 4.9  | 1.9  |      |      |      |      |
| <i>9H</i>     | 6.8             | 4.9  | 6.9  | 4.5  | 8.5  | 4.8  | 6.1  | 3.4  | 7.3  | 5.6  |      |      |      |      |
| <i>10H</i>    | 17.6            | 7.4  | 12.3 | 4.5  | 10.4 | 4.5  | 12.1 | 5.8  | 11   | 3.6  |      |      |      |      |
| <i>11H</i>    | 11.5            | 4.6  | 10.3 | 7.0  | 7.6  | 3.0  | 7.5  | 0.9  | 7.3  | 3.8  | 7.8  | 5.9  |      |      |
| <i>12H</i>    | 23.9            | 17.5 | 21.4 | 9.0  | 17.8 | 6.8  | 16.1 | 6.5  | 14.8 | 14.4 | 13.3 | 5.2  | 10.7 | 3.3  |
| <i>13H</i>    | 8.9             | 4.7  | 8.7  | 3.9  | 11.3 | 5.2  | 10.1 | 5.7  | 14.1 | 6.6  | 11   | 5.4  |      |      |
| <i>14H</i>    | 10.7            | 6.4  | 11.9 | 8.6  | 8.9  | 8.0  | 8.6  | 3.5  | 7.8  | 5.5  | 8    | 5.5  | 10.2 | 8.6  |
| <i>N</i>      | 14              | 14   | 14   | 14   | 12   | 12   | 11   | 11   | 8    | 8    | 4    | 4    | 2    | 2    |
| <i>Mean</i>   | 10.2            | 6.0  | 9.4  | 4.7  | 8.9  | 4.4  | 8.6  | 4.1  | 9.3  | 5.5  | 10.0 | 5.5  | 10.5 | 6.0  |
| <i>Median</i> | 10.4            | 5.0  | 8.3  | 4.2  | 8.5  | 4.5  | 8.3  | 4.1  | 7.7  | 4.6  | 9.5  | 5.5  | 10.5 | 6.0  |
| <i>SD</i>     | 3.55            | 3.52 | 4.22 | 2.19 | 3.43 | 1.77 | 3.38 | 1.65 | 3.56 | 3.90 | 2.66 | 0.29 | 0.35 | 3.75 |

Table A1.B – Online appendix: SDMA ( $\mu\text{g} / \text{dL}$ ) Pre- and Post-Values; number ( $N$ ), mean, median and standard deviation (SD) of dogs undergoing intermittent hemodialysis

| <i>Dogs</i>   | <i>Sessions</i> |       |       |       |       |       |       |       |       |       |       |       |       |       |
|---------------|-----------------|-------|-------|-------|-------|-------|-------|-------|-------|-------|-------|-------|-------|-------|
|               | 1               |       | 2     |       | 3     |       | 4     |       | 5     |       | 6     |       | 7     |       |
|               | Pre             | Post  | Pre   | Post  | Pre   | Post  | Pre   | Post  | Pre   | Post  | Pre   | Post  | Pre   | Post  |
| 1H            | 89              | 74    | 82    | 36    |       |       |       |       |       |       |       |       |       |       |
| 2H            | 74              | 52    | 68    | 56    |       |       |       |       |       |       |       |       |       |       |
| 3H            | 96              | 40    | 48    | 33    | 68    | 40    |       |       |       |       |       |       |       |       |
| 4H            | 25              | 17    | 30    | 25    | 28    | 20    | 26    | 22    |       |       |       |       |       |       |
| 5H            | 63              | 58    | 93    | 61    | 80    | 63    | 81    | 63    |       |       |       |       |       |       |
| 6H            | 57              | 60    | 65    | 44    | 58    | 47    | 78    | 52    |       |       |       |       |       |       |
| 7H            | 67              | 47    | 50    | 41    | 71    | 46    | 87    | 67    | 69    | 53    |       |       |       |       |
| 8H            | 100             | 100   | 90    | 61    | 100   | 69    | 92    | 54    | 100   | 77    |       |       |       |       |
| 9H            | 70              | 51    | 61    | 47    | 63    | 56    | 62    | 47    | 81    | 56    |       |       |       |       |
| 10H           | 60              | 45    | 55    | 42    | 54    | 50    | 91    | 65    | 84    | 58    |       |       |       |       |
| 11H           | 75              | 51    | 83    | 61    | 79    | 39    | 86    | 16    | 98    | 67    | 100   | 83    |       |       |
| 12H           | 30              | 36    | 48    | 27    | 51    | 35    | 47    | 30    | 58    | 55    | 56    | 46    | 69    | 50    |
| 13H           | 26              | 21    | 27    | 22    | 43    | 30    | 50    | 36    | 69    | 41    | 65    | 47    |       |       |
| 14H           | 75              | 50    | 93    | 73    | 86    | 69    | 86    | 56    | 100   | 94    | 100   | 97    | 100   | 100   |
| <i>N</i>      | 14              | 14    | 14    | 14    | 12    | 12    | 11    | 11    | 8     | 8     | 4     | 4     | 2     | 2     |
| <i>Mean</i>   | 64.6            | 49.9  | 63.6  | 44.6  | 64.9  | 46.8  | 71.2  | 45.8  | 82.3  | 62.4  | 80.1  | 68.0  | 84.3  | 74.8  |
| <i>Median</i> | 68.3            | 50.0  | 62.5  | 42.8  | 65.0  | 46.5  | 80.5  | 52.0  | 82.5  | 56.8  | 82.3  | 64.8  | 84.3  | 74.8  |
| <i>SD</i>     | 24.04           | 20.71 | 22.07 | 15.68 | 19.84 | 15.45 | 22.04 | 17.58 | 16.19 | 16.45 | 23.21 | 25.71 | 22.27 | 35.71 |

Table A2.A – Online appendix: Serum creatinine (mg/dL) Pre- and Post-Values; number (*N*), mean, median and standard deviation (SD) of dogs submitted to intravenous fluid therapy.

| <i>Dogs</i>   | <i>Sessions</i> |      |      |      |      |      |      |      |      |      |      |      |     |      |     |      |
|---------------|-----------------|------|------|------|------|------|------|------|------|------|------|------|-----|------|-----|------|
|               | 1               |      | 2    |      | 3    |      | 4    |      | 5    |      | 6    |      | 7   |      | 8   |      |
|               | Pre             | Post | Pre  | Post | Pre  | Post | Pre  | Post | Pre  | Post | Pre  | Post | Pre | Post | Pre | Post |
| <i>1F</i>     | 10.2            | 8.2  | 13.7 | *    |      |      |      |      |      |      |      |      |     |      |     |      |
| <i>2F</i>     | 12.9            | 12.5 | 12.2 | 11.9 | 13.1 | 12.6 |      |      |      |      |      |      |     |      |     |      |
| <i>3F</i>     | 6.8             | 8.3  | 9.4  | 9.9  | 9.9  | 10.0 | 9.7  | 9.9  |      |      |      |      |     |      |     |      |
| <i>4F</i>     | 7.2             | 6.6  | 11.3 | 10.4 | 10.7 | 9.7  | 9.0  | 9.1  | 9.3  | 10.6 |      |      |     |      |     |      |
| <i>5F</i>     | 11.3            | 10.9 | 15.0 | 11.2 | 13.2 | 14.8 | 19.6 | 18.9 | 23.8 | 19.5 |      |      |     |      |     |      |
| <i>6F</i>     | 6.6             | 6.8  | 6.4  | 6.0  | 7.1  | 9.1  | 6.4  | 5.6  | 5.3  | 6.0  | 6.4  | 5.8  | 8.4 | 10.9 | 9.0 | 8.5  |
| <i>7F</i>     | 10.6            | 10.2 | 11.0 | 10.2 | 10.0 | 8.7  | 10.4 | 11.0 | 14.5 | 13.3 | 10.9 | 12.6 |     |      |     |      |
| <i>8F</i>     | 15.8            | 13.1 | 16.6 | 15.4 | 17.1 | 15.8 | 22.6 | 17.8 | 20.8 | 23.8 | 24.2 | 26.2 |     |      |     |      |
| <i>9F</i>     | 6.0             | 5.5  | 5.9  | 6.5  | 6.2  | 6.2  | 6.3  | 6.3  | 6.4  | 6.5  | 7.1  | 8.1  |     |      |     |      |
| <i>10F</i>    | 15.0            | 15.1 | 16.0 | 16.2 | 16.2 | 14.6 | 13.8 | 15.0 | 13.6 | 13.8 | 12.0 | 11.6 |     |      |     |      |
| <i>N</i>      | 10              | 10   | 10   | 9    | 9    | 9    | 8    | 8    | 7    | 7    | 5    | 5    | 1   | 1    | 1   | 1    |
| <i>Mean</i>   | 10.2            | 9.7  | 11.7 | 10.8 | 11.5 | 11.3 | 12.2 | 11.7 | 13.4 | 13.3 | 12.1 | 12.9 | 8.4 | 10.9 | 9.0 | 8.5  |
| <i>Median</i> | 10.4            | 9.2  | 11.7 | 10.4 | 10.7 | 10.0 | 10.0 | 10.5 | 13.6 | 13.3 | 10.9 | 11.6 | 8.4 | 10.9 | 9.0 | 8.5  |
| <i>SD</i>     | 3.55            | 3.15 | 3.73 | 3.44 | 3.74 | 3.29 | 6.04 | 5.02 | 7.01 | 6.51 | 7.15 | 7.95 |     |      |     |      |

\* Second sample from Case 1F post treatment did not have sufficient volume for analysis

Table A2.B – Online appendix: SDMA ( $\mu\text{g} / \text{dL}$ ) Pre- and Post-Values; number ( $N$ ), mean, median and standard deviation (SD) of dogs submitted to intravenous fluid therapy.

| <i>Dogs</i>   | <i>Sessions</i> |       |       |       |       |       |       |       |       |       |       |       |      |      |      |      |
|---------------|-----------------|-------|-------|-------|-------|-------|-------|-------|-------|-------|-------|-------|------|------|------|------|
|               | 1               |       | 2     |       | 3     |       | 4     |       | 5     |       | 6     |       | 7    |      | 8    |      |
|               | Pre             | Post  | Pre   | Post  | Pre   | Post  | Pre   | Post  | Pre   | Post  | Pre   | Post  | Pre  | Post | Pre  | Post |
| 1F            | 87              | 74    | 100   | *     |       |       |       |       |       |       |       |       |      |      |      |      |
| 2F            | 100             | 100   | 100   | 100   | 100   | 100   |       |       |       |       |       |       |      |      |      |      |
| 3F            | 51              | 79    | 61    | 72    | 61    | 66    | 87    | 90    |       |       |       |       |      |      |      |      |
| 4F            | 72              | 73    | 97    | 100   | 94    | 83    | 81    | 95    | 60    | 85    |       |       |      |      |      |      |
| 5F            | 53              | 57    | 90    | 68    | 81    | 100   | 100   | 100   | 100   | 95    |       |       |      |      |      |      |
| 6F            | 75              | 71    | 52    | 59    | 73    | 69    | 69    | 52    | 75    | 63    | 70    | 71    | 73   | 75   | 64   | 47   |
| 7F            | 95              | 96    | 100   | 99    | 74    | 84    | 66    | 83    | 87    | 82    | 53    | 74    |      |      |      |      |
| 8F            | 49              | 54    | 74    | 68    | 63    | 84    | 100   | 98    | 100   | 100   | 100   | 100   |      |      |      |      |
| 9F            | 80              | 60    | 47    | 53    | 61    | 72    | 64    | 54    | 76    | 83    | 70    | 78    |      |      |      |      |
| 10F           | 100             | 100   | 100   | 100   | 100   | 100   | 100   | 100   | 100   | 100   | 100   | 100   |      |      |      |      |
| <i>N</i>      | 10              | 10    | 10    | 9     | 9     | 9     | 8     | 8     | 7     | 7     | 5     | 5     | 1    | 1    | 1    | 1    |
| <i>Mean</i>   | 76.0            | 76.3  | 81.9  | 79.6  | 78.2  | 84.0  | 83.2  | 83.8  | 85.2  | 86.6  | 78.5  | 84.4  | 73.0 | 75.0 | 64.0 | 47.0 |
| <i>Median</i> | 77.3            | 73.0  | 93.3  | 71.5  | 73.5  | 83.5  | 83.5  | 92.3  | 86.5  | 85.0  | 70.0  | 77.5  | 73.0 | 75.0 | 64.0 | 47.0 |
| <i>SD</i>     | 19.98           | 17.33 | 21.69 | 19.74 | 16.25 | 13.67 | 15.81 | 20.00 | 15.91 | 13.21 | 20.89 | 14.45 |      |      |      |      |

\* Second sample from Case 1F post treatment did not have sufficient volume for analysis
